# Supplementary material
Source: MDPI journal article supplement (https://www.mdpi.com/2227-9717/11/7/2102)

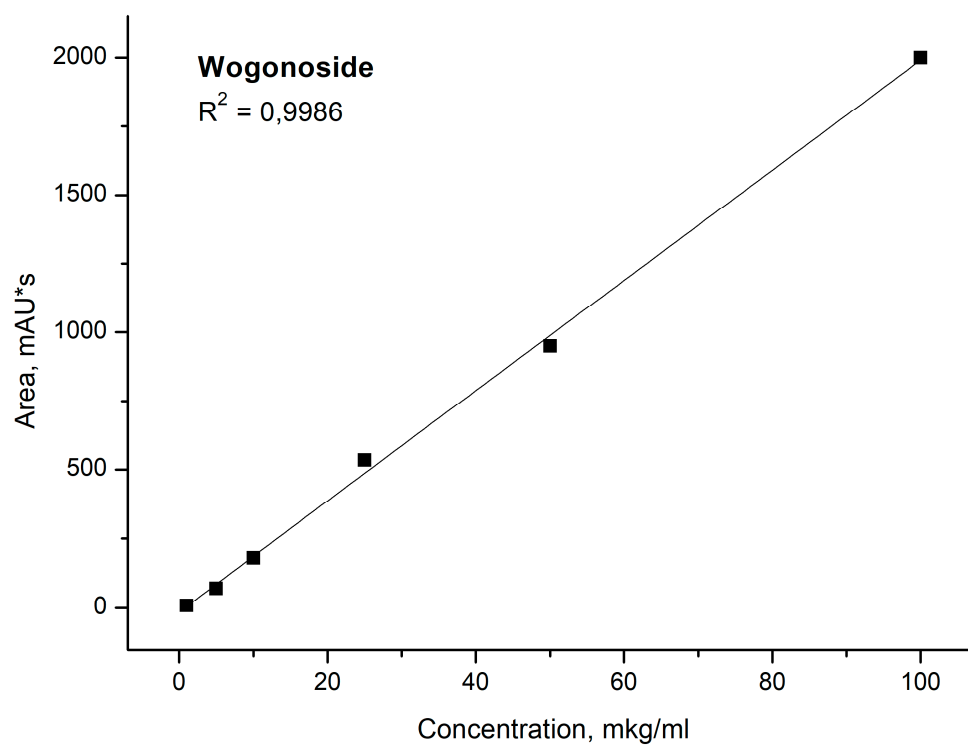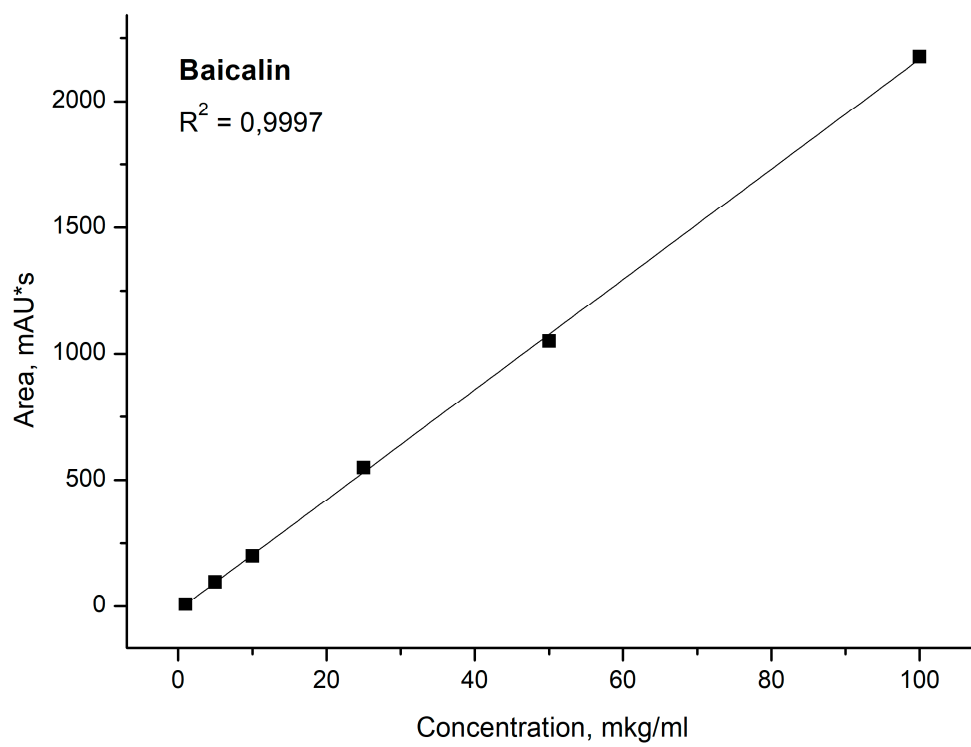

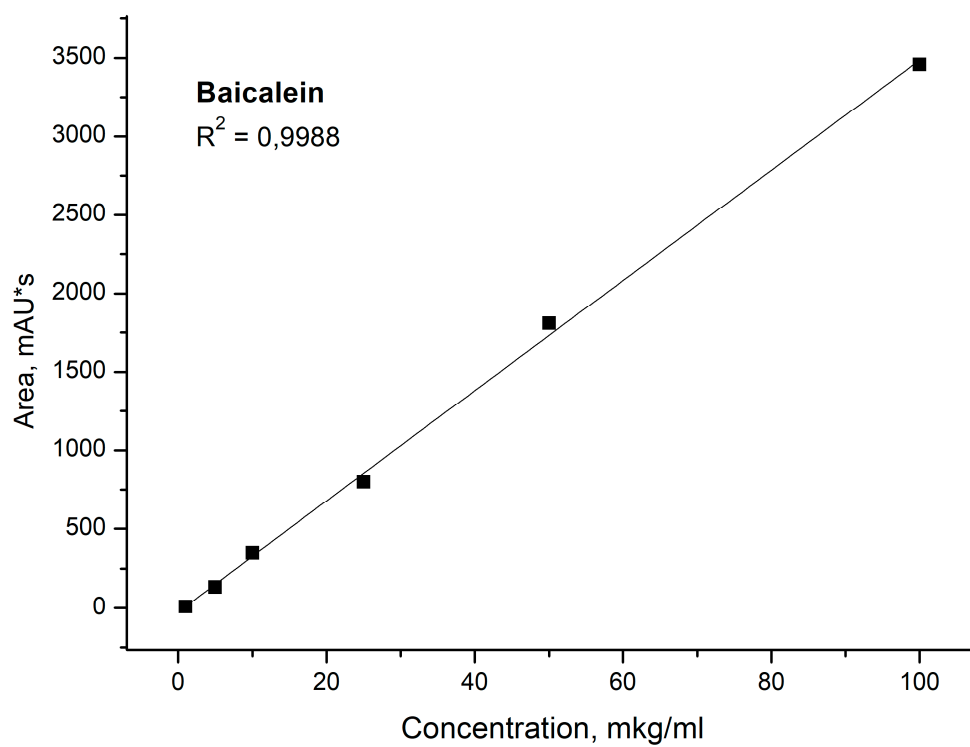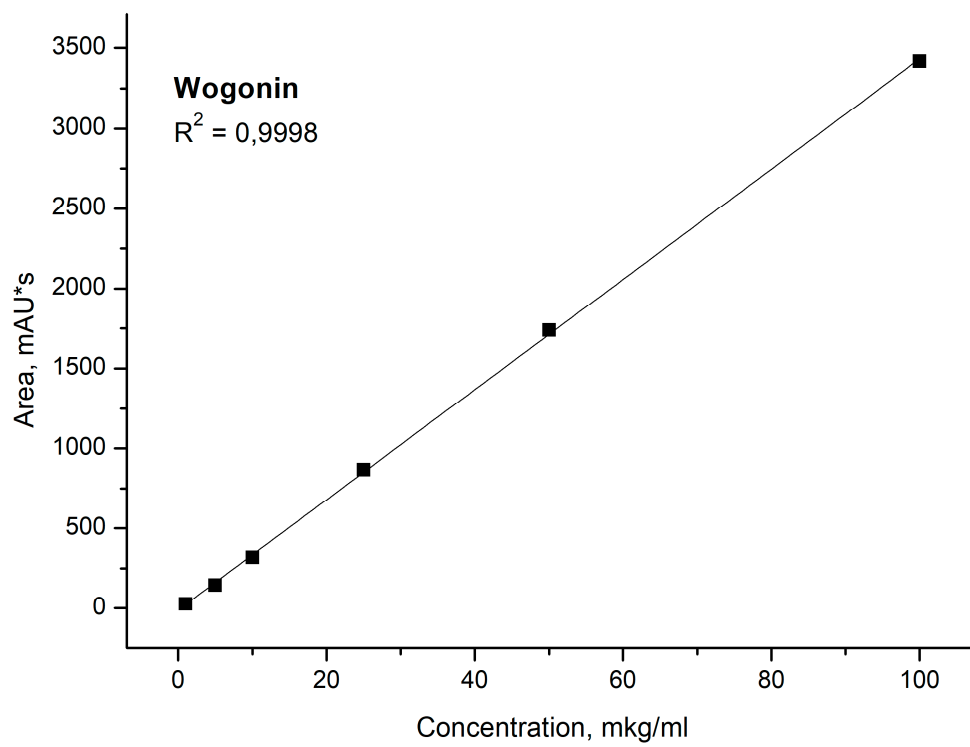

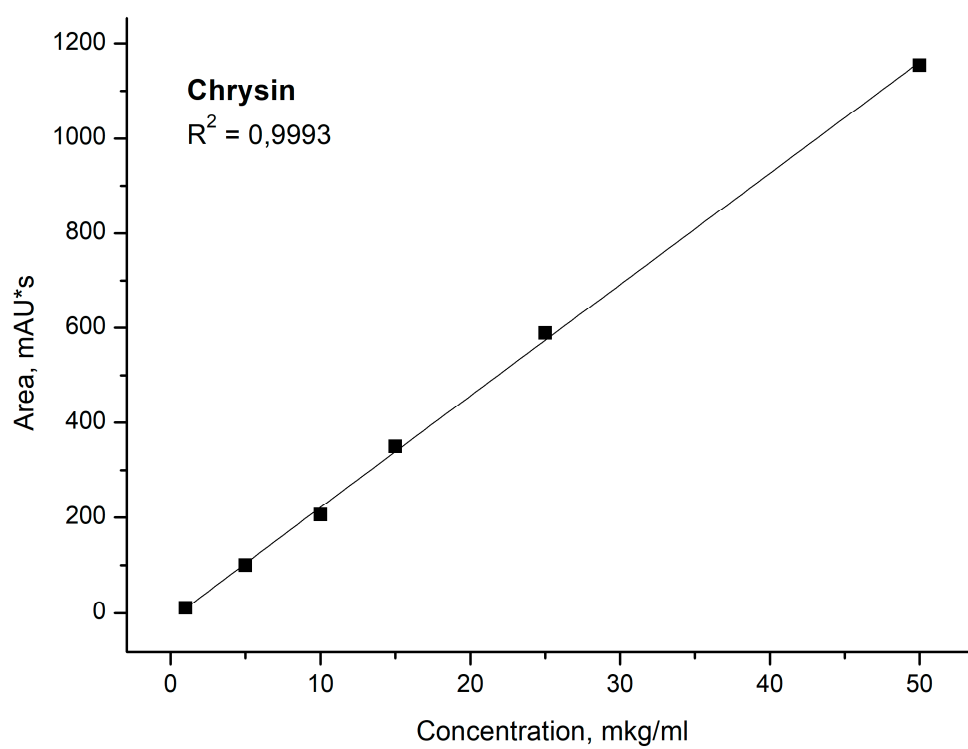

**Figure S1.** Calibration curve for HPLC-UV.

Supplement: s1 [file s1]
